# Supplementary material
Source: publisher figshare collection journal article supplement (https://gsajournals.figshare.com/ndownloader/files/12835433)
Supplement: Supplementary file 1 [file 12835433]

**Table S3: All promoter trap containing reads tagged with a searchable An. stephensi tag (min 14 nt) and a mate pair that matches AmCyan**

| Construct | Transcript tag | # | Scaffold insertion | Junction location | Read name | PE1 sequence |
| --- | --- | --- | --- | --- | --- | --- |
| Non-IRES | ASTE001888 | 1 | KB664416:466299 | 5’-UTR | HISEQ:166:C6EK4ANXX:5:2301:11376:50112 | GTTCCGCTCTGCCCCCGGAGGACATCCGTTGTCAGATGGCCCTGTCCAAC |
|  | ASTE003097 | 3 | KB664418:103665 | Intron 1 of 4 | HISEQ:164:C6EFLANXX:2:1216:19453:62916 | CGAGAATAGACGGAATGATTTCGCTAAAACAGATGGCCCTGTCCAACAAG |
|  |  |  |  |  | HISEQ:164:C6EFLANXX:2:1303:17344:32435 | CGAGAATAGACGGAATGATTTCGCTAAAACAGATGGCCCTGTCCAACAAG |
|  |  |  |  |  | HISEQ:166:C6EK4ANXX:5:2309:9123:51847 | CGAGAATAGACGGAATGATTTCGCTAAAAATGGCCCTGTCCAACAAGTTC |
|  | ASTE005963 | 1 | KB664733:36186 | 5’-UTR | HISEQ:166:C6EK4ANXX:5:2208:4518:87065 | GTTCTTCACACAGCAAAGATGGCCCTGTCCAACAAGTTCATCGGCGACGA |
|  | ASTE006277 | 93 | KB664587:103868 | 5’-UTR | HISEQ:164:C6EFLANXX:2:1313:4494:48870 | CAACCTTTCCCGGGAACTATCAGGCCATAACGCAGATGGCCCTGTCCAAC |
|  |  |  |  |  | HISEQ:164:C6EFLANXX:2:2302:16316:74020 | GGGAACTATCAGGCCATAACGCAGATGGCCCTGTCCAACAAGTTCATCGG |
|  |  |  |  |  | HISEQ:166:C6EK4ANXX:5:1204:15448:71930 | ACCTTTCCCGGGAACTATCAGGCCATAACGCAGATGGCCCTGTCCAACAA |
|  |  |  |  |  | HISEQ:164:C6EFLANXX:2:1101:10878:57462 | GGGAACTATCAGGCCATAACGCAGATGGCCCTGTCCAACAAGTTCATCGG |
|  |  |  |  |  | HISEQ:164:C6EFLANXX:2:1101:8491:63419 | TCAACCTTTCCCGGGAACTATCAGGCCATAACGATGGCCCTGTCCAACAA |
|  |  |  |  |  | HISEQ:164:C6EFLANXX:2:1104:6219:48531 | TTCCCGGGAACTATCAGGCCATAACGCAGATGGCCCTGTCCAACAAGTTC |
|  |  |  |  |  | HISEQ:164:C6EFLANXX:2:1105:12920:100235 | CCGGGAACTATCAGGCCATAACGCAGATGGCCCTGTCCAACAAGTTCATC |
|  |  |  |  |  | HISEQ:164:C6EFLANXX:2:1105:9555:2483 | CCGGGAACTATCAGGCCATAACGATGGCCCTGTCCAACAAGTTCATCGGC |
|  |  |  |  |  | HISEQ:164:C6EFLANXX:2:1108:12942:79203 | CCGGGAACTATCAGGCCATAACGATGGCCCTGTCCAACAAGTTCATCGGC |
|  |  |  |  |  | HISEQ:164:C6EFLANXX:2:1109:12543:81369 | TTTCCCGGGAACTATCAGGCCATAACGATGGCCCTGTCCAACAAGTTCAT |
|  |  |  |  |  | HISEQ:164:C6EFLANXX:2:1109:14771:64321 | CCCGGGAACTATCAGGCCATAACGATGGCCCTGTCCAACAAGTTCATCGG |
|  |  |  |  |  | HISEQ:164:C6EFLANXX:2:1109:5856:31457 | CCTTTCCCGGGAACTATCAGGCCATAACGATGGCCCTGTCCAACCAGTTC |
|  |  |  |  |  | HISEQ:164:C6EFLANXX:2:1113:11050:13573 | CCTTTCCCGGGAACTATCAGGCCATAACGCAGATGGCCCTGTCCAACAAG |
|  |  |  |  |  | HISEQ:164:C6EFLANXX:2:1114:8206:42002 | CCGGGAACTATCAGGCCATAACGCAGATGGCCCTGTCCAACAAGTTCATC |
|  |  |  |  |  | HISEQ:164:C6EFLANXX:2:1116:14860:52403 | CGGGAACTATCAGGCCATAACGATGGCCCTGTCCAACAAGTTCATCGGCG |
|  |  |  |  |  | HISEQ:164:C6EFLANXX:2:1201:16993:56583 | CTTTCCCGGGAACTATCAGGCCATAACGATGGCCCTGTCCAACAAGTTCA |
|  |  |  |  |  | HISEQ:164:C6EFLANXX:2:1208:16353:22468 | CCGGGAACTATCAGGCCATAACGATGGCCCTGTCCAACAAGTTCATCGGC |
|  |  |  |  |  | HISEQ:164:C6EFLANXX:2:1210:2554:97571 | CCGGGAACTATCAGGCCATAACGCAGATGGCCCTGTCCAACAAGTTCATC |
|  |  |  |  |  | HISEQ:164:C6EFLANXX:2:1210:9904:81375 | TTTCCCGGGAACTATCAGGCCATAACGATGGCCCTGTCCAACAAGTTCAT |
|  |  |  |  |  | HISEQ:164:C6EFLANXX:2:1211:15634:99637 | CCCGGGAACTATCAGGCCATAACGCAGATGGCCCTGTCCAACAAGTTCAT |
|  |  |  |  |  | HISEQ:164:C6EFLANXX:2:1213:11100:48313 | CGGGAACTATCAGGCCATAACGATGGCCCTGTCCAACAAGTTCATCGGCG |
|  |  |  |  |  | HISEQ:164:C6EFLANXX:2:1213:2187:18355 | CCGGGAACTATCAGGCCATAACGATGGCCCTGTCCAACAAGTTCATCGGC |
|  |  |  |  |  | HISEQ:164:C6EFLANXX:2:1214:11745:33331 | CGGGAACTATCAGGCCATAACGATGGCCCTGTCCAACAAGTTCATCGGCA |
|  |  |  |  |  | HISEQ:164:C6EFLANXX:2:1214:14063:8668 | GGAACTATCAGGCCATAACGATGGCCCTGTCCAACAAGTTCATCGGCGAC |
|  |  |  |  |  | HISEQ:164:C6EFLANXX:2:1215:21065:90950 | CTTTCCCGGGAACTATCAGGCCATAACGCAGATGGCCCTGTCCAACAAGT |
|  |  |  |  |  | HISEQ:164:C6EFLANXX:2:1216:13240:87943 | CTCGGGAACTATCAGGCCATAACGATGGCCCTGTCCAACAAGTTCATCGG |
|  |  |  |  |  | HISEQ:164:C6EFLANXX:2:1301:9114:30648 | TTTCCCGGGAACTATCAGGCCATAACGATGGCCCTGTCCAACAAGTTCAT |
|  |  |  |  |  | HISEQ:164:C6EFLANXX:2:1305:16880:28809 | CCGGGAACTATCAGGCCATAACGATGGCCCTGTCCAACAAGTTCATCGGC |
|  |  |  |  |  | HISEQ:164:C6EFLANXX:2:1306:4168:13447 | CAACCTTTCCCGGGAACTATCAGGCCATAACGATGGCCCTGTCCAACAAG |
|  |  |  |  |  | HISEQ:164:C6EFLANXX:2:1307:17392:12387 | CCGGGAACTATCAGGCCATAACGATGGCCCTGTCCAACAAGTTCATCGGC |
|  |  |  |  |  | HISEQ:164:C6EFLANXX:2:1308:3979:91824 | CTATCAGGCCATAACGATGGCCCTGTCCAACAAGTTCATCGGCGACGACA |
|  |  |  |  |  | HISEQ:164:C6EFLANXX:2:1313:6900:56203 | CTCAACCTTTCCCGGGAACTATCAGGCCATAACGATGGCCCTGTCCAACA |
|  |  |  |  |  | HISEQ:164:C6EFLANXX:2:1314:10004:22223 | CCCGGGAACTATCAGGCCATAACGCAGATGGCCCTGTCCAACAAGTTCAT |
|  |  |  |  |  | HISEQ:164:C6EFLANXX:2:1314:11961:52466 | CGGGAACTATCAGGCCATAACGATGGCCCTGTCCAACAAGTTCATCGGCG |
|  |  |  |  |  | HISEQ:164:C6EFLANXX:2:1315:14202:37818 | GAACTATCAGGCCATAACGATGGCCCTGTCCAACAAGTTCATCGGCGACG |
|  |  |  |  |  | HISEQ:164:C6EFLANXX:2:2103:14090:67175 | CCGGGAACTATCAGGCCATAACGATGGCCCTGTCCAACAAGTTCATCGGC |
|  |  |  |  |  | HISEQ:164:C6EFLANXX:2:2103:15040:87006 | CCGGGAACTATCAGGCCATAACGCAGATGGCCCTGTCCAACAAGTTCATC |
|  |  |  |  |  | HISEQ:164:C6EFLANXX:2:2103:4156:60882 | CCGGGAACTATCAGGCCATAACGATGGCCCTGTCCAACAAGTTCATCGGC |
|  |  |  |  |  | HISEQ:164:C6EFLANXX:2:2105:14467:27051 | CCGGGAACTATCAGGCCATAACGCAGATGGCCCTGTCCAACAAGTTCATC |
|  |  |  |  |  | HISEQ:164:C6EFLANXX:2:2107:12961:46561 | CCGGGAACTATCAGGCCATAACGATGGCCCTGTCCAACAAGTTCATCGGC |
|  |  |  |  |  | HISEQ:164:C6EFLANXX:2:2108:17300:14735 | TTTCCCGGGAACTATCAGGCCATAACGCAGATGGCCCTGTCCAACAAGTT |
|  |  |  |  |  | HISEQ:164:C6EFLANXX:2:2111:17352:18241 | GGGAACTATCAGGCCATAACGATGGCCCTGTCCAACAAGTTCATCGGCGA |
|  |  |  |  |  | HISEQ:164:C6EFLANXX:2:2111:20134:15978 | CCCGGGAACTATCAGGCCATAACGCAGATGGCCCTGTCCAACAAGTTCAT |
|  |  |  |  |  | HISEQ:164:C6EFLANXX:2:2115:14181:60796 | GGAACTATCAGGCCATAACGCAGATGGCCCTGTCCAACAAGTTCATCGGC |
|  |  |  |  |  | HISEQ:164:C6EFLANXX:2:2201:15732:27295 | TTTCCCGGGAACTATCAGGCCATAACGATGGCCCTGTCCAACAAGTTCAT |
|  |  |  |  |  | HISEQ:164:C6EFLANXX:2:2204:13194:19441 | GGGAACTATCAGGCCATAACGATGGCCCTGTCCAACAAGTTCATCGGCGA |
|  |  |  |  |  | HISEQ:164:C6EFLANXX:2:2205:20249:16828 | GGGAACTATCAGGCCATAACGCAGATGGCCCTGTCCAACAAGTTCATCGG |
|  |  |  |  |  | HISEQ:164:C6EFLANXX:2:2210:11787:27912 | CGGGAACTATCAGGCCATAACGATGGCCCTGTCCAACAAGTTCATCGGCG |
|  |  |  |  |  | HISEQ:164:C6EFLANXX:2:2210:12281:36550 | GGGAACTATCAGGCCATAACGATGGCCCTGTCCAACAAGTTCATCGGCGA |
|  |  |  |  |  | HISEQ:164:C6EFLANXX:2:2214:21089:19879 | CCGGGAACTATCAGGCCATAACGCAGATGGCCCTGTCCAACAAGTTCATC |
|  |  |  |  |  | HISEQ:164:C6EFLANXX:2:2214:5173:50060 | CCGGGAACTATCAGGCCATAACGCAGATGGCCCTGTCCAACAAGTTCATC |
|  |  |  |  |  | HISEQ:164:C6EFLANXX:2:2216:2879:59099 | CCTCGACCTTTCCCGGGAACTATCAGGCCATAACGATGGCCCTGTCCAAC |
|  |  |  |  |  | HISEQ:164:C6EFLANXX:2:2301:18344:19604 | CCTTTCCCGGGAACTATCAGGCCATAACGATGGCCCTGTCCAACAAGTTC |
|  |  |  |  |  | HISEQ:164:C6EFLANXX:2:2302:2955:15851 | CTTTCCCGGGAACTATCAGGCCATAACGCAGATGGCCCTGTCCAACAAGT |
|  |  |  |  |  | HISEQ:164:C6EFLANXX:2:2303:3480:38950 | CCGGGAACTATCAGGCCATAACGCAGATGGCCCTGTCCAACAAGTTCATC |
|  |  |  |  |  | HISEQ:164:C6EFLANXX:2:2303:4702:29448 | CGGGAACTATCAGGCCATAACGATGGCCCTGTCCAACAAGTTCATCGGCG |
|  |  |  |  |  | HISEQ:164:C6EFLANXX:2:2309:12455:80734 | AACCTTTCCCGGGAACTATCAGGCCATAACGATGGCCCTGTCCAACAAGT |
|  |  |  |  |  | HISEQ:164:C6EFLANXX:2:2309:4395:69920 | CGGGAACTATCAGGCCATAACGCAGATGGCCCTGTCCAACAAGTTCATCG |
|  |  |  |  |  | HISEQ:164:C6EFLANXX:2:2310:9126:8061 | CTCAACCTTTCCCGGGAACTATCAGGCCATAACGATGGCCCTGTCCAACA |
|  |  |  |  |  | HISEQ:164:C6EFLANXX:2:2311:19798:64477 | GGGAACTATCAGGCCATAACGATGGCCCTGTCCAACAAGTTCATCGGCGA |
|  |  |  |  |  | HISEQ:164:C6EFLANXX:2:2316:8093:91453 | GGAACTATCAGGCCATAACGATGGCCCTGTCCAACAAGTTCATCGGCGAC |
|  |  |  |  |  | HISEQ:166:C6EK4ANXX:5:1105:1383:82316 | GGGAACTCTCAGGCCATAACGCAGATGGCCCTGTCCAACAAGTTCATCGG |
|  |  |  |  |  | HISEQ:166:C6EK4ANXX:5:1107:20525:62642 | GCCTCAACCTTTCCCGGGAACTATCAGGCCATAACGATGGCCCTGTCCAA |
|  |  |  |  |  | HISEQ:166:C6EK4ANXX:5:1107:20760:94042 | CCGGGAACTATCAGGCCATAACGCAGATGGCCCTGTCCAACAAGTTCATC |
|  |  |  |  |  | HISEQ:166:C6EK4ANXX:5:1114:14185:49576 | CCGGGAACTATCAGGCCATAACGATGGCCCTGTCCAACAAGTTCATCGGC |
|  |  |  |  |  | HISEQ:166:C6EK4ANXX:5:1114:20226:87646 | CCTCAACCTTTCCCGGGAACTATCAGGCCATAACGATGGCCCTGTCCAAC |
|  |  |  |  |  | HISEQ:166:C6EK4ANXX:5:1115:15380:67300 | TTTCCCGGGAACTATCAGGCCATAACGCAGATGGCCCTGTCCAACAAGTT |
|  |  |  |  |  | HISEQ:166:C6EK4ANXX:5:1202:12010:92448 | CGGGAACTATCAGGCCATAACGATGGCCCTGTCCAACAAGTTCATCGGCG |
|  |  |  |  |  | HISEQ:166:C6EK4ANXX:5:1205:3576:81406 | CGGGAACTATCAGGCCATAACGATGGCCCTGTCCAACAAGTTCATCGGCG |
|  |  |  |  |  | HISEQ:166:C6EK4ANXX:5:1212:13999:18946 | CCCGGGAACTATCAGGCCATAACGATGGCCCTGTCCAACAAGTTCATCGG |
|  |  |  |  |  | HISEQ:166:C6EK4ANXX:5:1302:7630:29806 | CCGGGAACTATCAGGCCATAACGCAGATGGCCCTGTCCAACAAGTTCATC |
|  |  |  |  |  | HISEQ:166:C6EK4ANXX:5:1303:6944:55042 | CAACCTTTCCCGGGAACTATCAGGCCATAACGATGGCCCTGTCCAACAAG |
|  |  |  |  |  | HISEQ:166:C6EK4ANXX:5:1304:7953:27383 | CCTCAACCTTTCCCGGGAACTATCAGGCCATAACGATGGCCCTGTCCAAC |
|  |  |  |  |  | HISEQ:166:C6EK4ANXX:5:1307:11923:95952 | GGGAACTATCAGGCCATAACGATGGCCCTGTCCAACAAGTTCATCGGCGA |
|  |  |  |  |  | HISEQ:166:C6EK4ANXX:5:1312:6916:10807 | AACTATCAGGCCATAACGATGGCCCTGTCCAACAAGTTCATCGGCGACGA |
|  |  |  |  |  | HISEQ:166:C6EK4ANXX:5:1314:5744:82137 | GGAACTATCAGGCCATAACGATGGCCCTGTCCAACAAGTTCATCGGCGAC |
|  |  |  |  |  | HISEQ:166:C6EK4ANXX:5:1316:6401:83671 | CCGGGAACTATCAGGCCATAACGATGGCCCTGTCCAACAAGTTCATCGGC |
|  |  |  |  |  | HISEQ:166:C6EK4ANXX:5:2103:4482:23095 | CTCAACCTTTCCCGGGAACTATCAGGCCATAACGATGGCCCTGTCCAACA |
|  |  |  |  |  | HISEQ:166:C6EK4ANXX:5:2104:6491:40427 | GGGAACTATCAGGCCATAACGATGGCCCTGTCCAACAAGTTCATCGGCGA |
|  |  |  |  |  | HISEQ:166:C6EK4ANXX:5:2105:11986:99557 | CTATCAGGCCATAACGATGGCCCTGTCCAACAAGTTCATCGGCGACGACA |
|  |  |  |  |  | HISEQ:166:C6EK4ANXX:5:2106:13031:2330 | CTATCAGGCCATAACGATGGCCCTGTCCAACAAGTTCATCGGCGACGACA |
|  |  |  |  |  | HISEQ:166:C6EK4ANXX:5:2107:19657:45739 | CCTTTCCCGGGAACTATCAGGCCATAACGATGGCCCTGTCCAACAAGTTC |
|  |  |  |  |  | HISEQ:166:C6EK4ANXX:5:2108:15826:86597 | GAACTATCAGGCCATAACGATGGCCCTGTCCAACAAGTTCATCGGCGACG |
|  |  |  |  |  | HISEQ:166:C6EK4ANXX:5:2116:10505:39686 | CCGGGAACTATCAGGCCATAACGATGGCCCTGTCCAACAAGTTCATCGGC |
|  |  |  |  |  | HISEQ:166:C6EK4ANXX:5:2203:6151:82403 | CCGGGAACTATCAGGCCATAACGCAGATGGCCCTGTCCAACAAGTTCATC |
|  |  |  |  |  | HISEQ:166:C6EK4ANXX:5:2208:20125:19102 | TCAACCTTTCCCGGGAACTATCAGGCCATAACGATGGCCCTGTCCAACAA |
|  |  |  |  |  | HISEQ:166:C6EK4ANXX:5:2301:2521:54554 | CGGGAACTATCAGGCCATAACGCAGATGGCCCTGTCCAACAAGTTCATCG |
|  |  |  |  |  | HISEQ:166:C6EK4ANXX:5:2301:7438:55704 | CGGGAACTATCAGGCCATAACGCAGATGGCCCTGTCCAACAAGTTCATCG |
|  |  |  |  |  | HISEQ:166:C6EK4ANXX:5:2303:5445:96603 | CAACCTTTCCCGGGAACTATCAGGCCATAACGCAGATGGCCCTGTCCAAC |
|  |  |  |  |  | HISEQ:166:C6EK4ANXX:5:2304:10973:20337 | CCGGGAACTATCAGGCCATAACGATGGCCCTGTCCAACAAGTTCATCGGC |
|  |  |  |  |  | HISEQ:166:C6EK4ANXX:5:2304:16804:82751 | GGGAACTATCAGGCCATAACGCAGATGGCCCTGTCCAACAAGTTCATCGG |
|  |  |  |  |  | HISEQ:166:C6EK4ANXX:5:2308:10138:78747 | CCGGGAACTATCAGGCCATAACGATGGCCCTGTCCAACAAGTTCATCGGC |
|  |  |  |  |  | HISEQ:166:C6EK4ANXX:5:2308:16912:31558 | CCGGGAACTATCAGGCCATAACGATGGCCCTGTCCAACAAGTTCATCGGC |
|  | ASTE006314 | 1 | KB664288:636233 | 5’-UTR | HISEQ:166:C6EK4ANXX:5:1312:16143:2177 | TGGTGTCAGAGTAAGATGGCCCTGTCCAACAAGTTCATCGGCGACGACAT |
|  | ASTE006629 | 2 | KB665199:435749 | 5’-UTR | HISEQ:166:C6EK4ANXX:5:1309:12920:27857 | CCGAGCTAAATAATCGGAATCTTACGAAAGATGGCCCTGTCCAACAAGTT |
|  |  |  |  |  | HISEQ:166:C6EK4ANXX:5:2211:1417:100148 | AATCGGAATCTTACGAAAGATGGCCCTGTCCAACAAGTTCATCGGCGACG |
|  | ASTE008287 | 1 | KB664477:412329 | 5’-UTR | HISEQ:164:C6EFLANXX:2:2312:17083:83960 | TGAAAAGAATCTTCAAATAATATCAAAAAGATGGCCCTGTCCAACAAGTT |
|  | ASTE011209 | 1 | KB664576:155320 | Intron 5 of 5 | HISEQ:166:C6EK4ANXX:5:2214:8917:63720 | GGAGGAGCTCATCAAGCGCGCAAAGCAGATGGCCCTGTCCAACAAGTTCA |
|  |  |  |  |  |  |  |
| IRES | ASTE000126 | 1 | KB664954:1365602 | Intron 2 of 2 | HISEQ:166:C6EK4ANXX:5:1103:19279:7102 | GCAAGACATGATCAACGAGGTCGACGCGGACGATTATTTGGCTAGCATGG |
|  | ASTE000270 | 1 | KB664732:782272 | 5’-UTR | HISEQ:166:C6EK4ANXX:5:1212:5078:93146 | AACGGAAGGGCAGCTTTACGTTGAAGATTATTTGGCTAGCATGGCCCTGT |
|  | ASTE000780 | 4 | KB665232:679279 | 5’-UTR | HISEQ:164:C6EFLANXX:2:2309:18562:48823 | GTTTTGACCCTTGCTAGCTCCAGATTATTTGGCTAGCATGGCCCTGTCCA |
|  |  |  |  |  | HISEQ:166:C6EK4ANXX:5:1103:5558:23312 | GTGGTTTTGACCCTTGCTAGCTCCAGATTATTTGGCTAGCATGGCCCTGT |
|  |  |  |  |  | HISEQ:166:C6EK4ANXX:5:1215:10747:35050 | TTTTGACCCTTGCTAGCTCCAGATTATTTGGCTAGCATGGCCCTGTCCAA |
|  |  |  |  |  | HISEQ:166:C6EK4ANXX:5:2208:16785:61631 | TTTTGACCCTTGCTAGCTCCAGATTATTTGGCTAGCATGGCCCTGTCCAA |
|  | ASTE003737 | 1 | KB664450:281209 | Intron 2 of 2 | HISEQ:164:C6EFLANXX:2:1105:16390:99039 | TTCAACGATGCCGATGCCGACAAAGATTATTTGGCTAGCATGGCCCTGTC |
|  | ASTE006277 | 30 | KB664587:103868 | 5’-UTR | HISEQ:164:C6EFLANXX:2:1104:12424:67195 | AACCTTTCCCGGGAGCTATCAGGCCATAACGATTATTTGGCTAGCATGGC |
|  |  |  |  |  | HISEQ:164:C6EFLANXX:2:1106:20228:73755 | CCGGGAACTATCAGGCCATAACGATTATTTGGCTAGCATGGCCCTGTCCA |
|  |  |  |  |  | HISEQ:164:C6EFLANXX:2:1109:18427:80085 | GGGAACTATCAGGCCATAACGATTATTTGGCTAGCATGGCCCTGTCCAAC |
|  |  |  |  |  | HISEQ:164:C6EFLANXX:2:1216:3842:38922 | ATCAGGCCATAACGATTATTTGGCTAGCATGGCCCTGTCCAACAAGTTCA |
|  |  |  |  |  | HISEQ:164:C6EFLANXX:2:1216:9643:70054 | CCCGGGAGCTATCAGGCCATAACGATTATTTGGCTAGCATGGCCCTGTCC |
|  |  |  |  |  | HISEQ:164:C6EFLANXX:2:1302:12600:66074 | CCGGGAACTATCAGGCCATAACGATTATTTGGCTAGCATGGCCCTGTCCA |
|  |  |  |  |  | HISEQ:164:C6EFLANXX:2:1310:2495:67474 | CTTTCCCGGGAGCTATCAGGCCATAACGATTATTTGGCTAGCATGGCCCT |
|  |  |  |  |  | HISEQ:164:C6EFLANXX:2:2104:13616:29242 | TTTCCCGGGAACTATCAGGCCATAACGATTATTTGGCTAGCATGGCCCTG |
|  |  |  |  |  | HISEQ:164:C6EFLANXX:2:2106:11712:45774 | TATCAGGCCATAACGATTATTTGGCTAGCATGGCCCTGTCCAACAAGTTC |
|  |  |  |  |  | HISEQ:164:C6EFLANXX:2:2109:7913:53684 | GGGAGCTATCAGGCCATAACGATTATTTGGCTAGCATGGCCCTGTCCAAC |
|  |  |  |  |  | HISEQ:164:C6EFLANXX:2:2112:19301:35384 | CTCAACCTTTCCCGGGAACTATCAGGCCATAACGATTATTTGGCTAGCAT |
|  |  |  |  |  | HISEQ:164:C6EFLANXX:2:2202:6934:29394 | CCCGGGAGCTATCAGGCCATAACGATTATTTGGCTAGCATGGCCCTGTCC |
|  |  |  |  |  | HISEQ:164:C6EFLANXX:2:2206:16819:9942 | CAACCTTTCCCGGGAACTATCAGGCCATAACGATTATTTGGCTAGCATGG |
|  |  |  |  |  | HISEQ:164:C6EFLANXX:2:2211:6099:74091 | CCGGGAACTATCAGGCCATAACGATTATTTGGCTAGCATGGCCCTGTCCA |
|  |  |  |  |  | HISEQ:164:C6EFLANXX:2:2305:3097:55220 | CCGGGAGCTATCAGGCCATAACGATTATTTGGCTAGCATGGCCCTGTCCA |
|  |  |  |  |  | HISEQ:164:C6EFLANXX:2:2315:5130:6070 | CCGGGAGCTATCAGGCCATAACGATTATTTGGCTAGCATGGCCCTGTCCA |
|  |  |  |  |  | HISEQ:166:C6EK4ANXX:5:1101:4497:14929 | CCTTTCCCGGGAACTATAGGCCATAACGATTATTTGGCTAGCATGGCCCT |
|  |  |  |  |  | HISEQ:166:C6EK4ANXX:5:1101:7693:14677 | CCTTTCCCGGGAACTATCAGGCCATAACGATTATTTGGCTAGCATGGCCC |
|  |  |  |  |  | HISEQ:166:C6EK4ANXX:5:1109:10502:10604 | CTCAACCTTTCCCGGGAACTATCAGGCCATAACGATTATTTGGCTAGCAT |
|  |  |  |  |  | HISEQ:166:C6EK4ANXX:5:1112:14117:97396 | CCGGGAACTATCAGGCCATAACGATTATTTGGCTAGCATGGCCCTGTCCA |
|  |  |  |  |  | HISEQ:166:C6EK4ANXX:5:1112:3121:69320 | CTCAACCTTTCCCGGGAACTATCAGGCCATAACGATTATTTGGCTAGCAT |
|  |  |  |  |  | HISEQ:166:C6EK4ANXX:5:1113:17223:9265 | CCGGGAACTATCAGGCCATAACGATTATTTGGCTAGCATGGCCCTGTCCA |
|  |  |  |  |  | HISEQ:166:C6EK4ANXX:5:1206:7431:81074 | CCGGGAACTATCAGGCCATAACGATTATTTGGCTAGCATGGCCCTGTCCA |
|  |  |  |  |  | HISEQ:166:C6EK4ANXX:5:1212:15852:10545 | CCGGGAGCTATCAGGCCATAACGATTATTTGGCTAGCATGGCCCTGTCCA |
|  |  |  |  |  | HISEQ:166:C6EK4ANXX:5:1302:1173:88143 | TCAACCTTTCCCGGGAACTATCAGGCCATAACGATTATTTGGCTAGCATG |
|  |  |  |  |  | HISEQ:166:C6EK4ANXX:5:1306:8719:44132 | CTCAACCTTTCCCGGGAGCTATCAGGCCATAACGATTATTTGGCTAGCAT |
|  |  |  |  |  | HISEQ:166:C6EK4ANXX:5:1307:1150:78526 | CCCGGGAACTATCAGGCCATAACGATTATTTGGCTAGCATGGCCCTGTCC |
|  |  |  |  |  | HISEQ:166:C6EK4ANXX:5:2306:15745:18749 | CCTTTCCCGGGAACTATCAGGCCATAACGATTATTTGGCTAGCATGGCCC |
|  |  |  |  |  | HISEQ:166:C6EK4ANXX:5:2307:19001:56673 | CCGGGAACTATCAGGCCATAACGATTATTTGGCTAGCATGGCCCTGTCCA |
|  |  |  |  |  | HISEQ:166:C6EK4ANXX:5:2314:14295:68321 | CTCAACCTTTCCCGGGAACTATCAGGCCATAACGATTATTTGGCTAGCAT |
|  | ASTE008914 | 1 | KB664428:218959 | 5’-UTR | HISEQ:164:C6EFLANXX:2:2103:21109:54288 | CCGAAAGTCCATACCGCAAGAGTTGCAAAGATTATTTGGCTAGCATGGCC |
|  | ASTE009536 | 3 | KB664400:665982 | 5’-UTR (alternative donor start) | HISEQ:164:C6EFLANXX:2:1209:13043:79701 | GCCGGTTGGAAGAAAGATTATTTGGCTAGCATGGCCCTGTCCAACAAGTT |
|  |  |  |  |  | HISEQ:166:C6EK4ANXX:5:1205:5356:92553 | CGGCCGGTTGGAAGAAAGATTATTTGGCTAGCATGGCCCTGTCCAACAAG |
|  |  |  |  |  | HISEQ:166:C6EK4ANXX:5:2213:15703:66293 | GTTGAGTTCGGCCGGTTGGAAGAAAGATTATTTGGCTAGCATGGCCCTGT |
|  | ASTE010450 | 1 | KB664844:68028 | Intron 1 of 10 | HISEQ:164:C6EFLANXX:2:1214:20588:87319 | CCGATCAGCTGTTTTGCCCTGTGGGCGATGAAAATTATTTGGCTAGCATG |
|  | ASTE015161 | 2 | KB664456:135953 | 5’-UTR | HISEQ:164:C6EFLANXX:2:1107:20767:84438 | CAGCAATCGAATCAACAATTATTTGGCTAGCATGGCCCTGTCCAACAAGT |
|  |  |  |  |  | HISEQ:166:C6EK4ANXX:5:1101:12649:72044 | CCCAGCATCAGCAATCGAATCAACAATTATTTGGCTAGCATGGCCCTGTC |
